# Supplementary material for: The Potential Use of Herbal Fingerprints by Means of HPLC and TLC for Characterization and Identification of Herbal Extracts and the Distinction of Latvian Native Medicinal Plants
Source: MDPI journal article supplement (doi:10.3390/molecules27082555), 2022-04-15
Supplement: s1 [file s1]

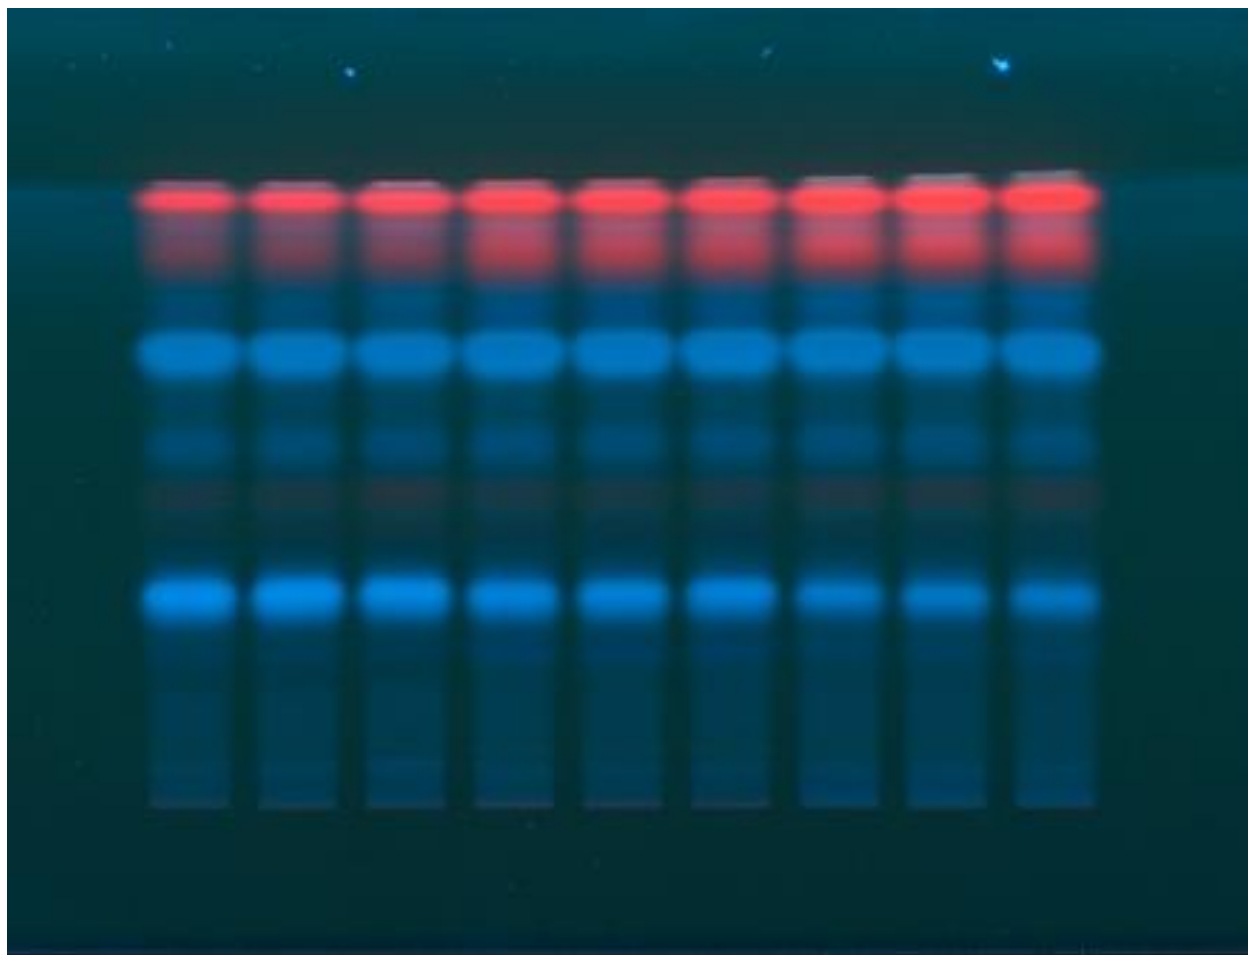

**Figure S1.** Developed HPTLC plate of *Achillea millefolium* L. extracts under 366 nm UV light.

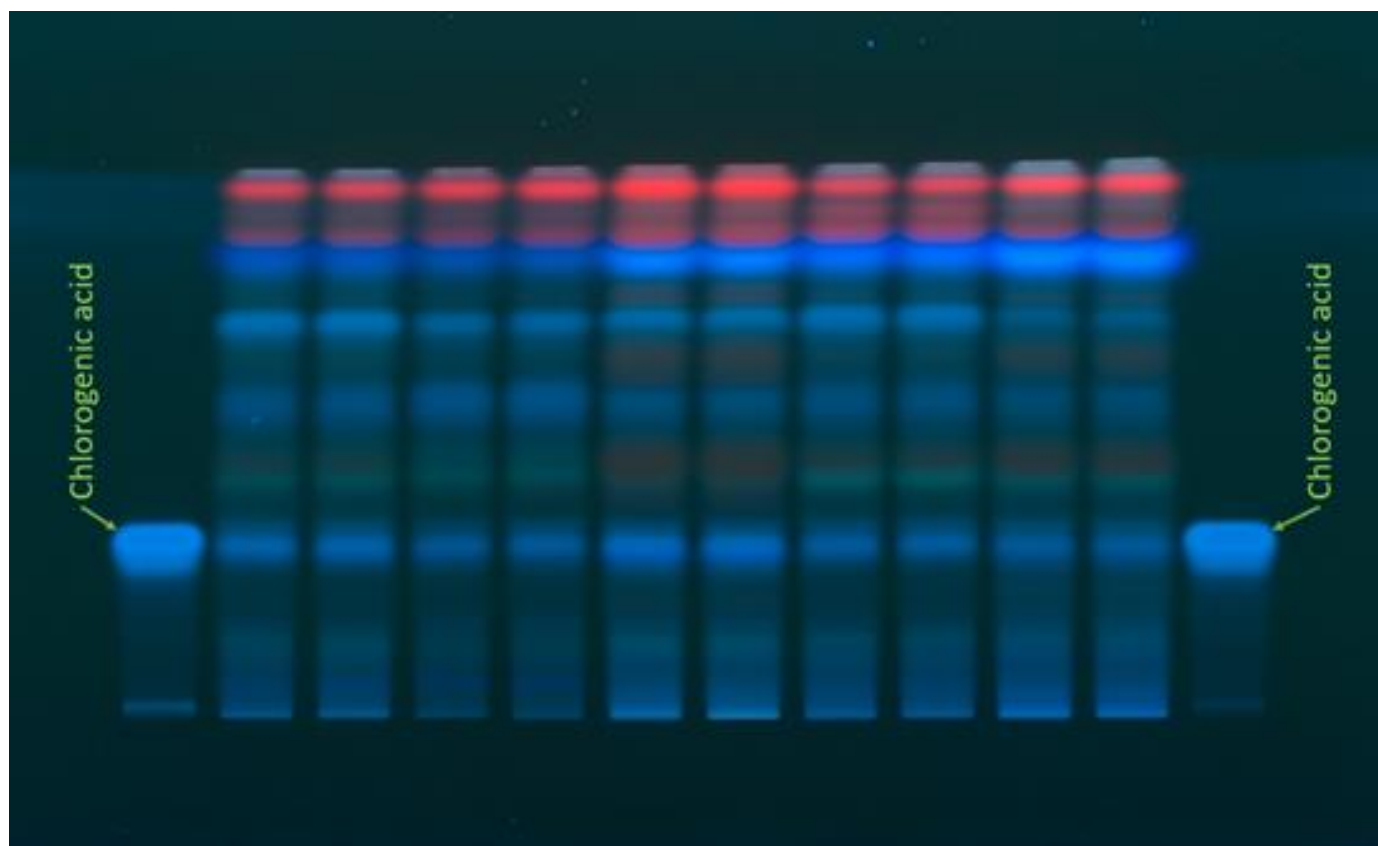

**Figure S2.** Developed HPTLC plate of *Matricaria recutita* L. extracts and chlorogenic acid under 366 nm UV light.

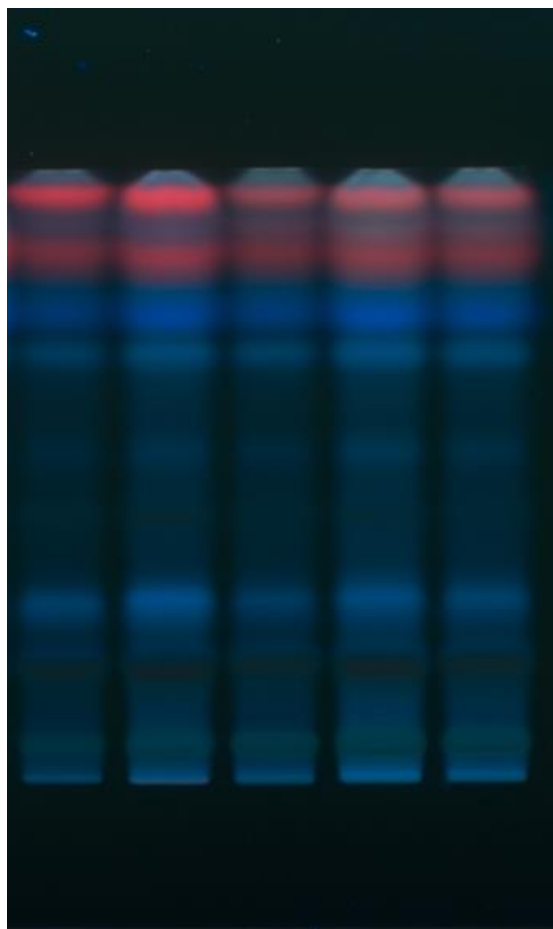

**Figure S3.** Developed HPTLC plate of *Calendula officinalis* L. extracts under 366 nm UV light.

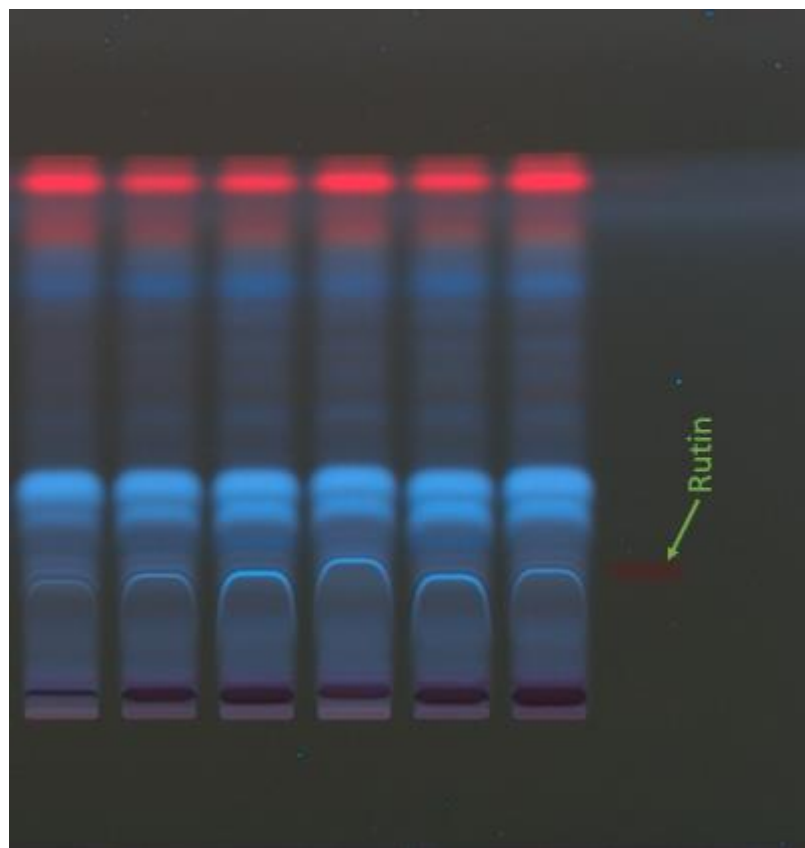

**Figure S4.** Developed HPTLC plate of *Hibiscus sabdariffa* L. extracts and rutin under 366 nm UV light.

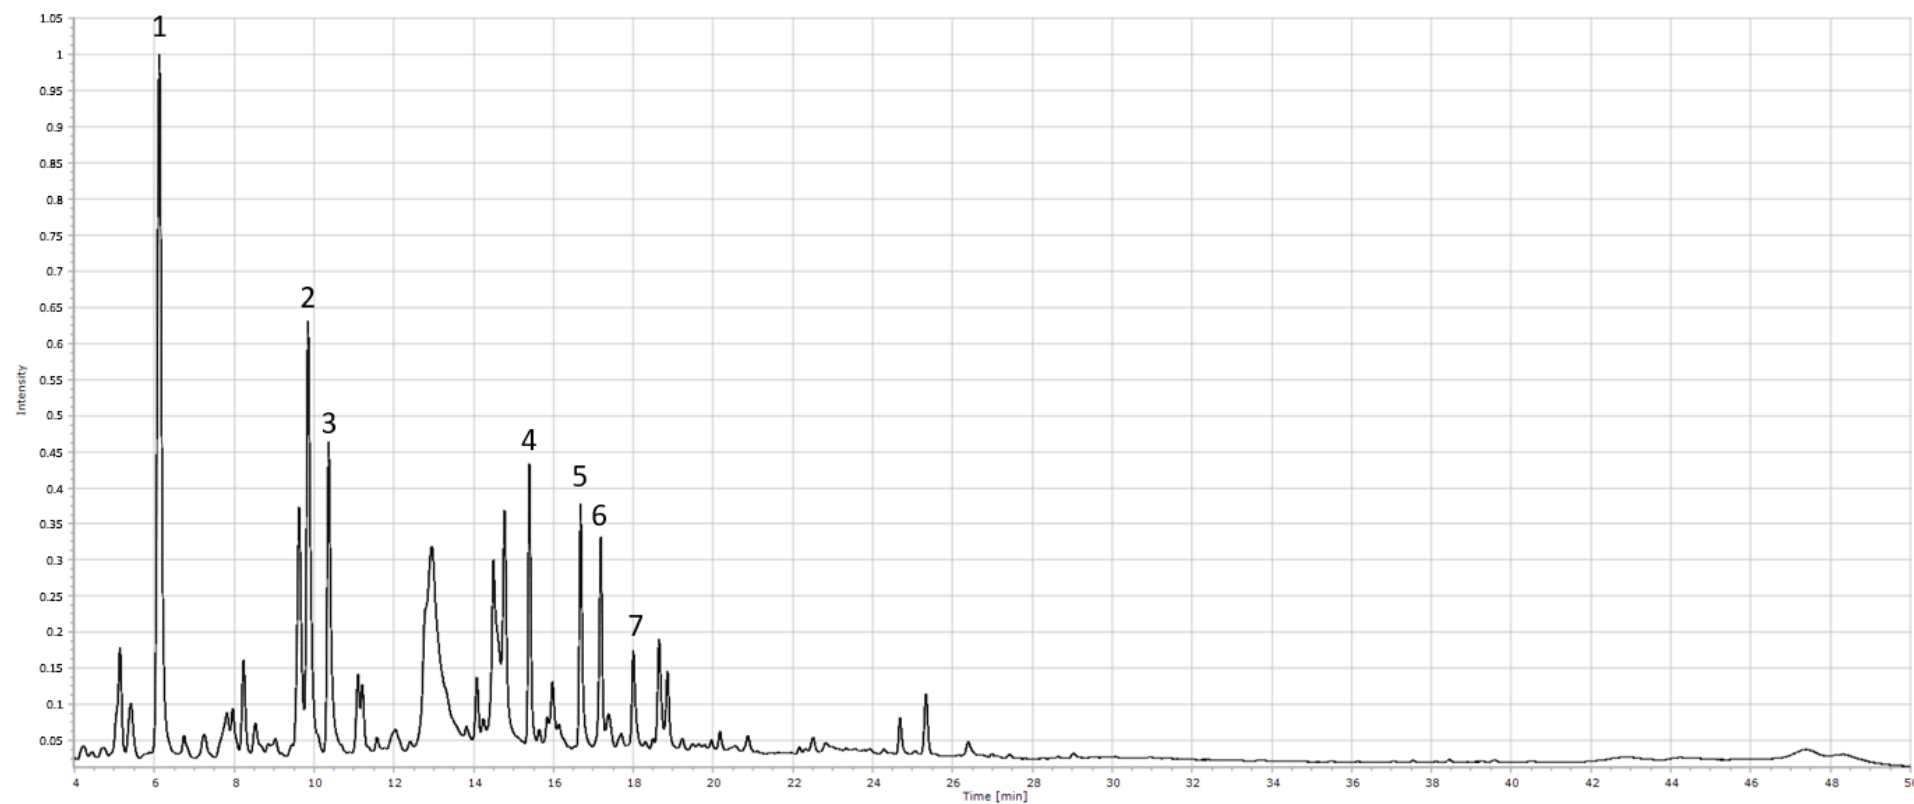

**Figure S5.** The average HPLC chromatogram of *Hibiscus sabdariffa* L. extracts, 270 nm. 2 – chlorogenic acid; 3 – caffeic acid; 7 – rutin.

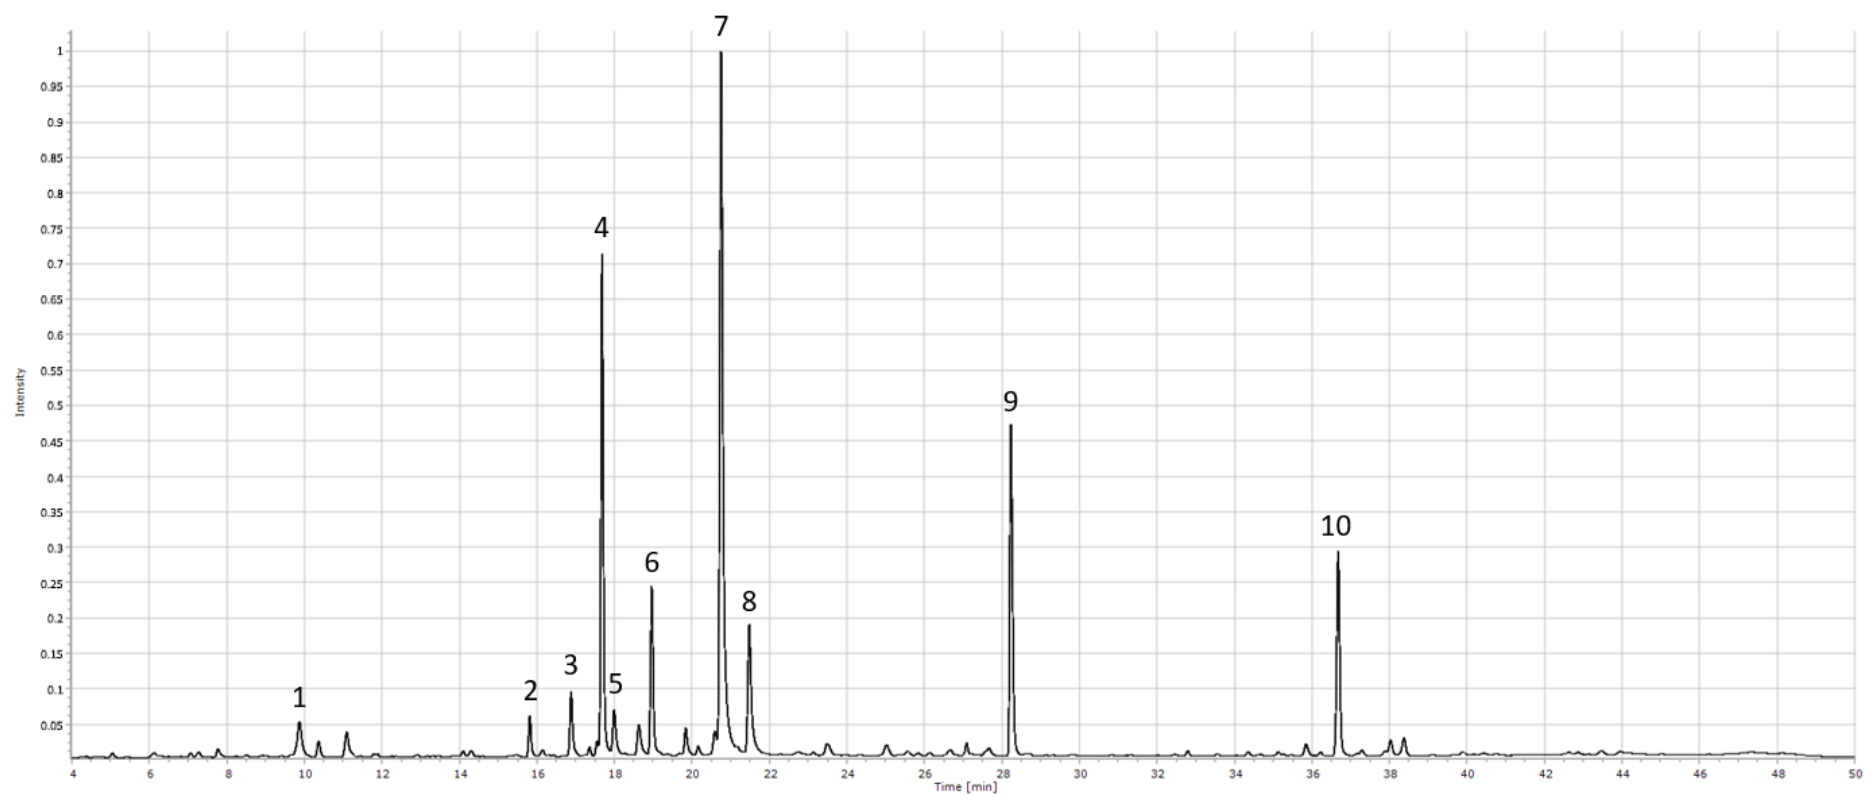

**Figure S6.** The average HPLC chromatogram of *Calendula officinalis* L. extracts, 270 nm. 1 – chlorogenic acid; 5– rutin.

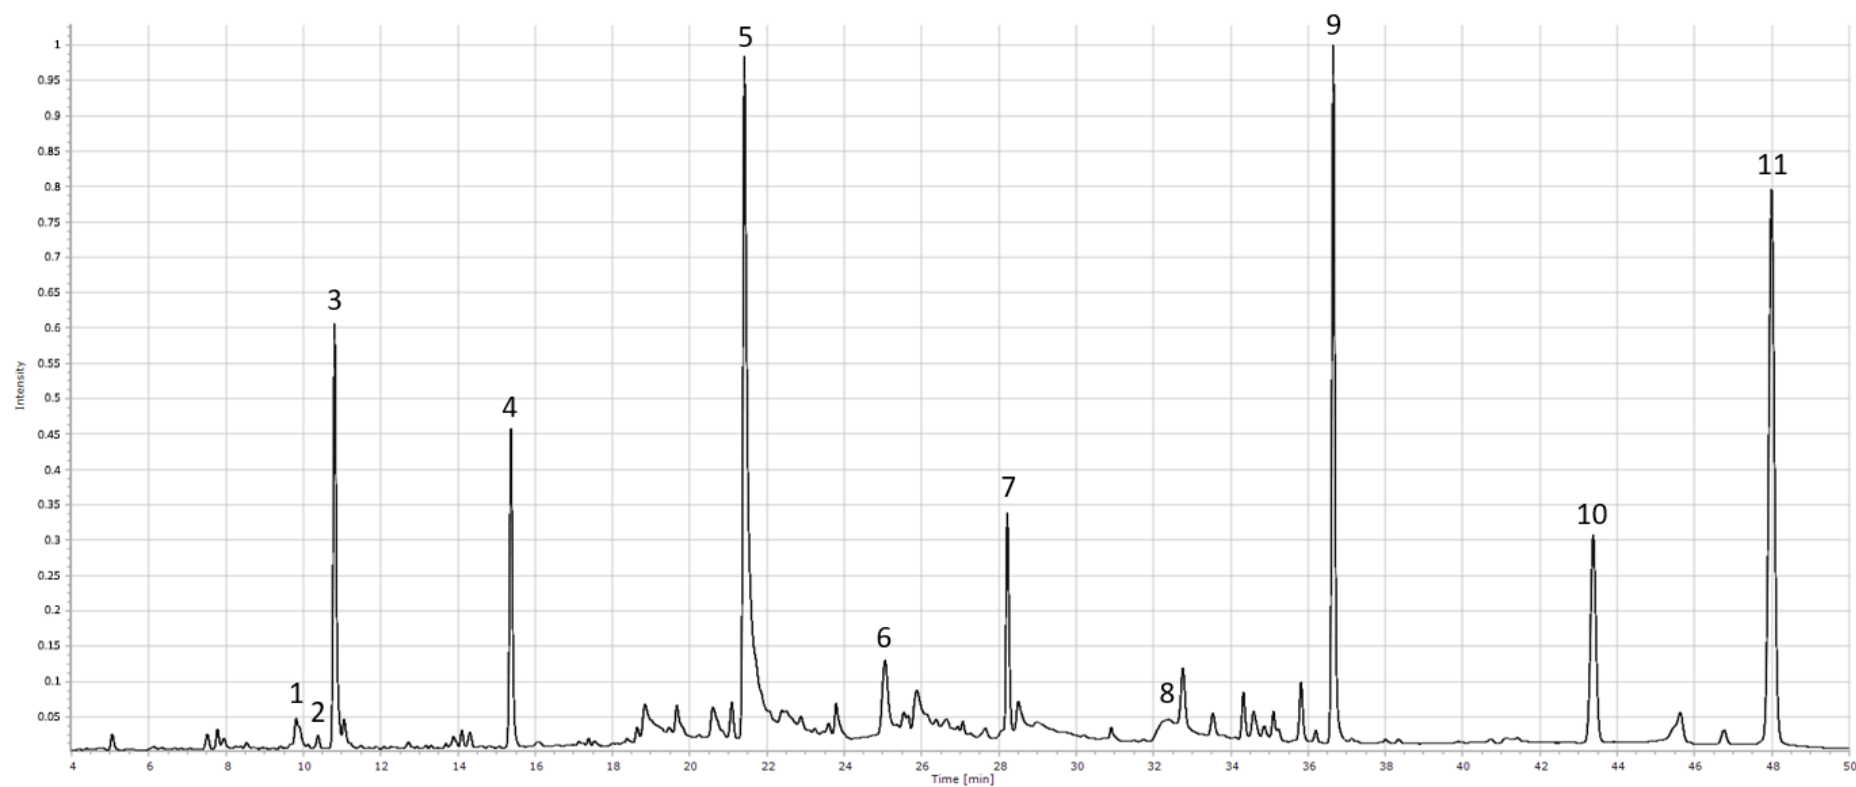

**Figure S7.** The average HPLC chromatogram of *Matricaria recutita* L. extracts, 270 nm. 1 – chlorogenic acid; 2 – caffeic acid; 5 – apigenin-7-glucoside; 8 – apigenin.

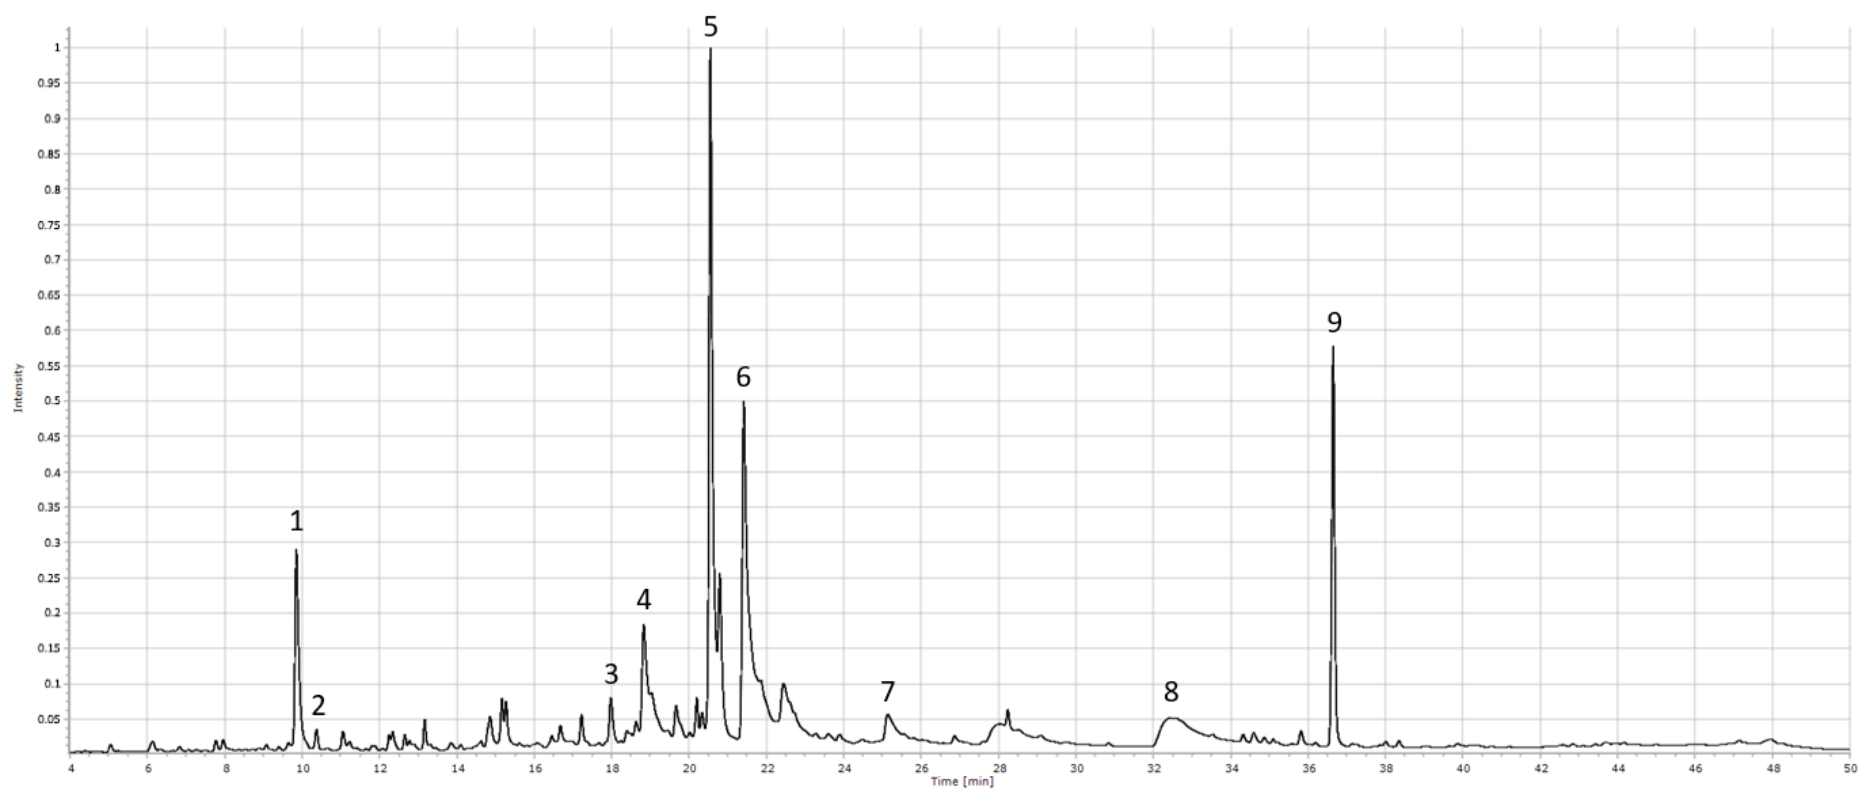

**Figure S8.** The average HPLC chromatogram of *Achillea millefolium* L. extracts, 270 nm. 1 – chlorogenic acid; 2 – caffeic acid; 3 – rutin; 6 – apigenin-7-glucoside; 8 – apigenin.

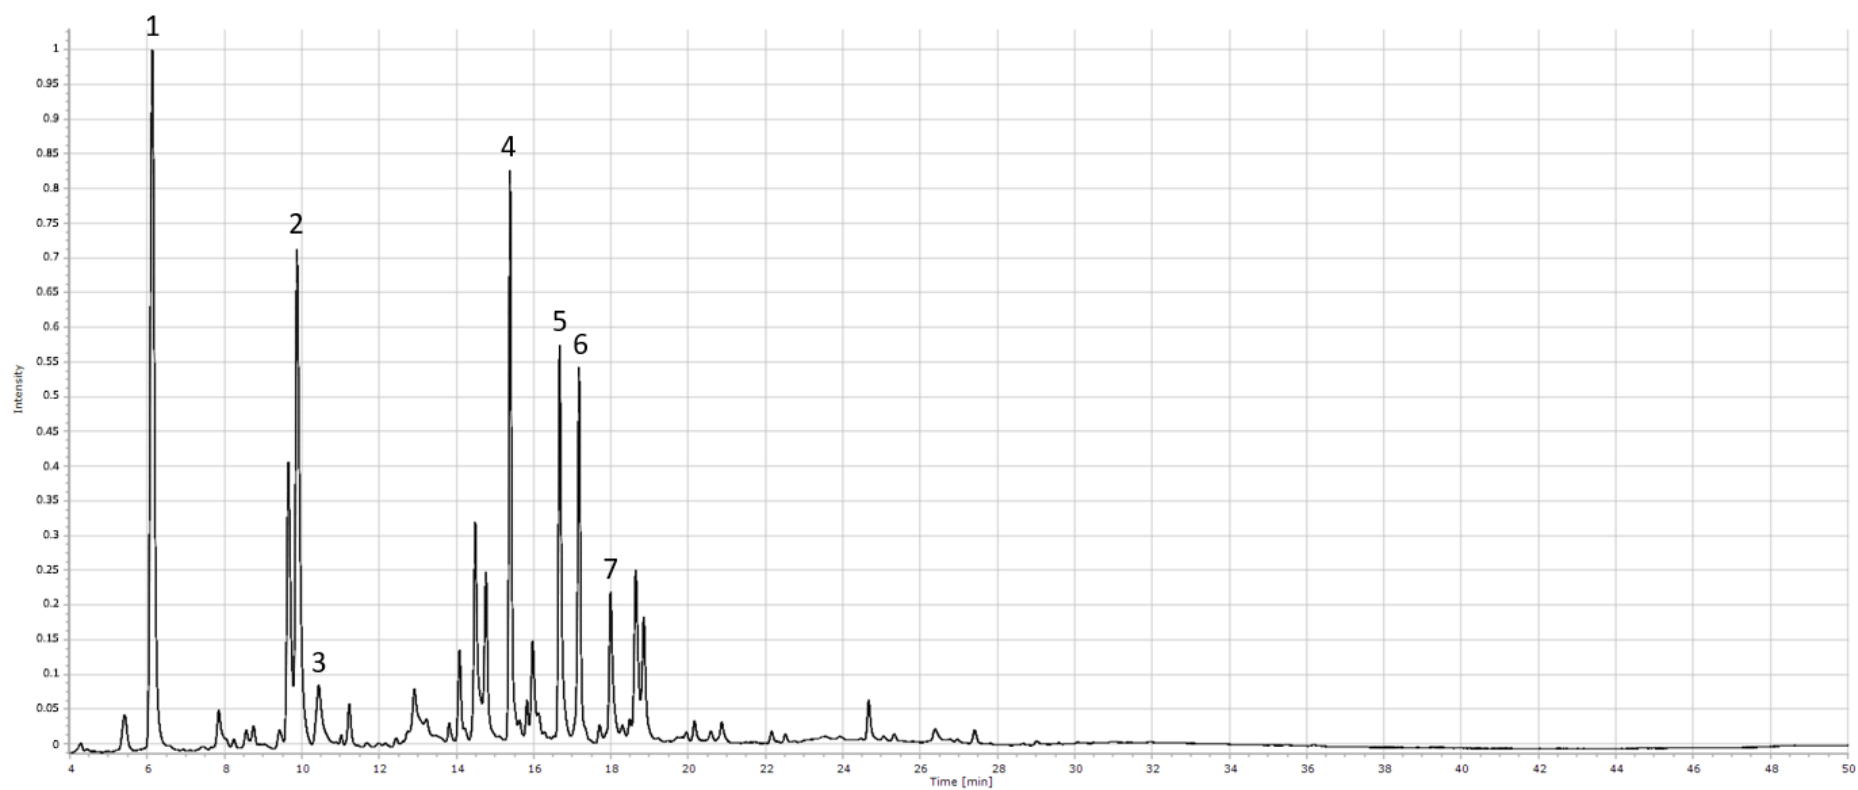

**Figure S9.** The average HPLC chromatogram of *Hibiscus sabdariffa* L. extracts, 360 nm. 2 – chlorogenic acid; 3 – caffeic acid; 7 – rutin.

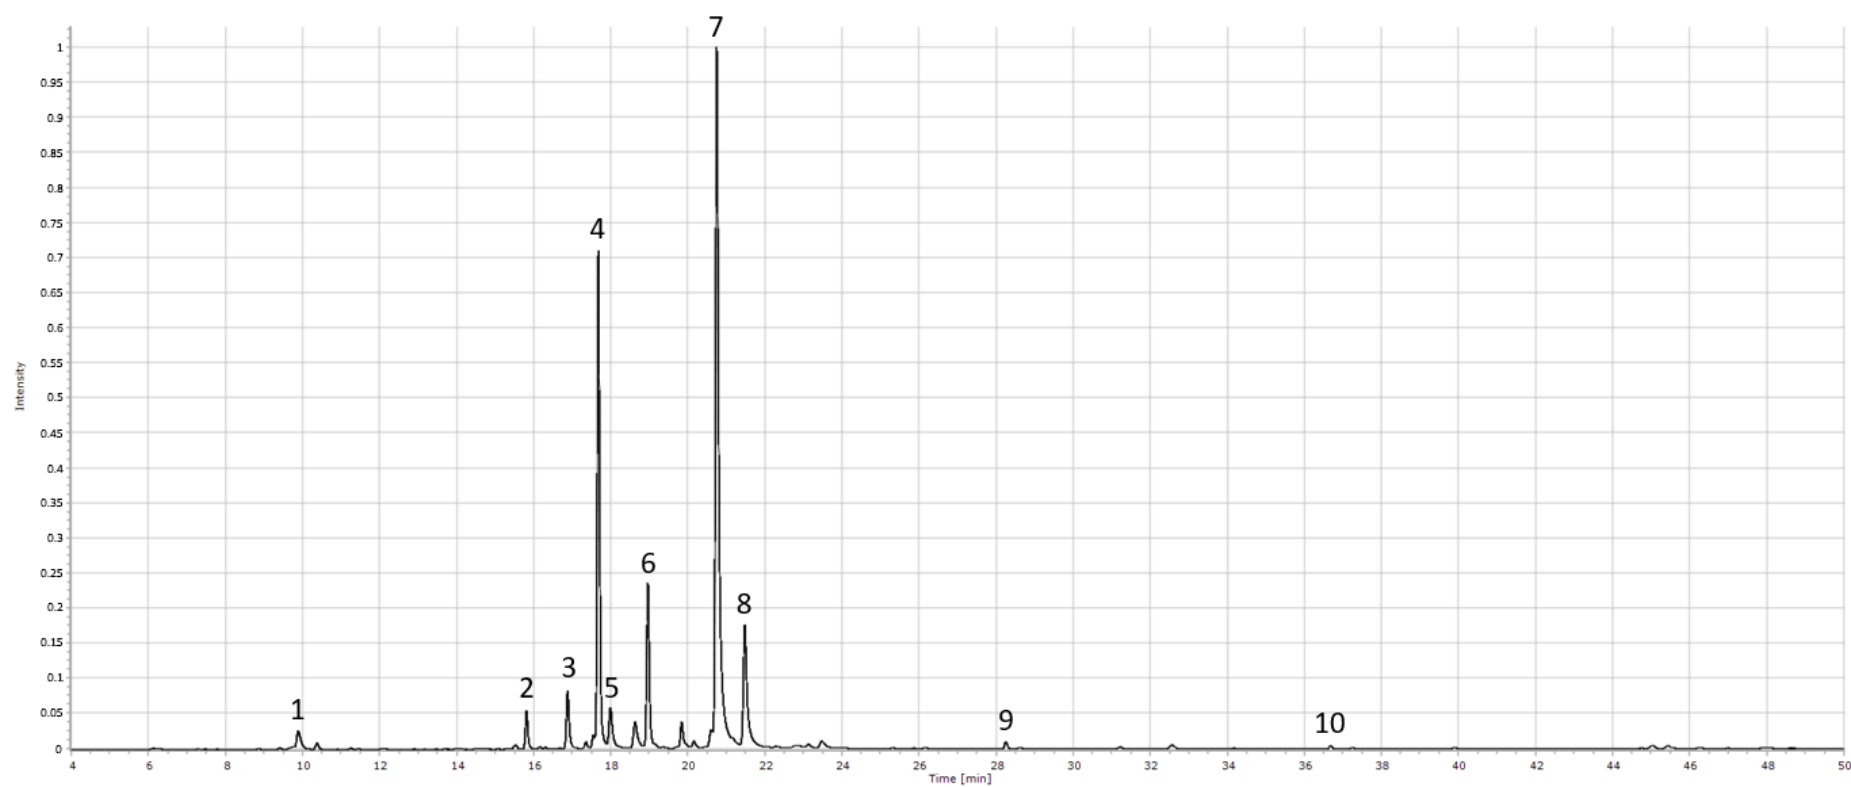

**Figure S10.** The average HPLC chromatogram of *Calendula officinalis* L. extracts, 360 nm. 1 – chlorogenic acid; 5– rutin.

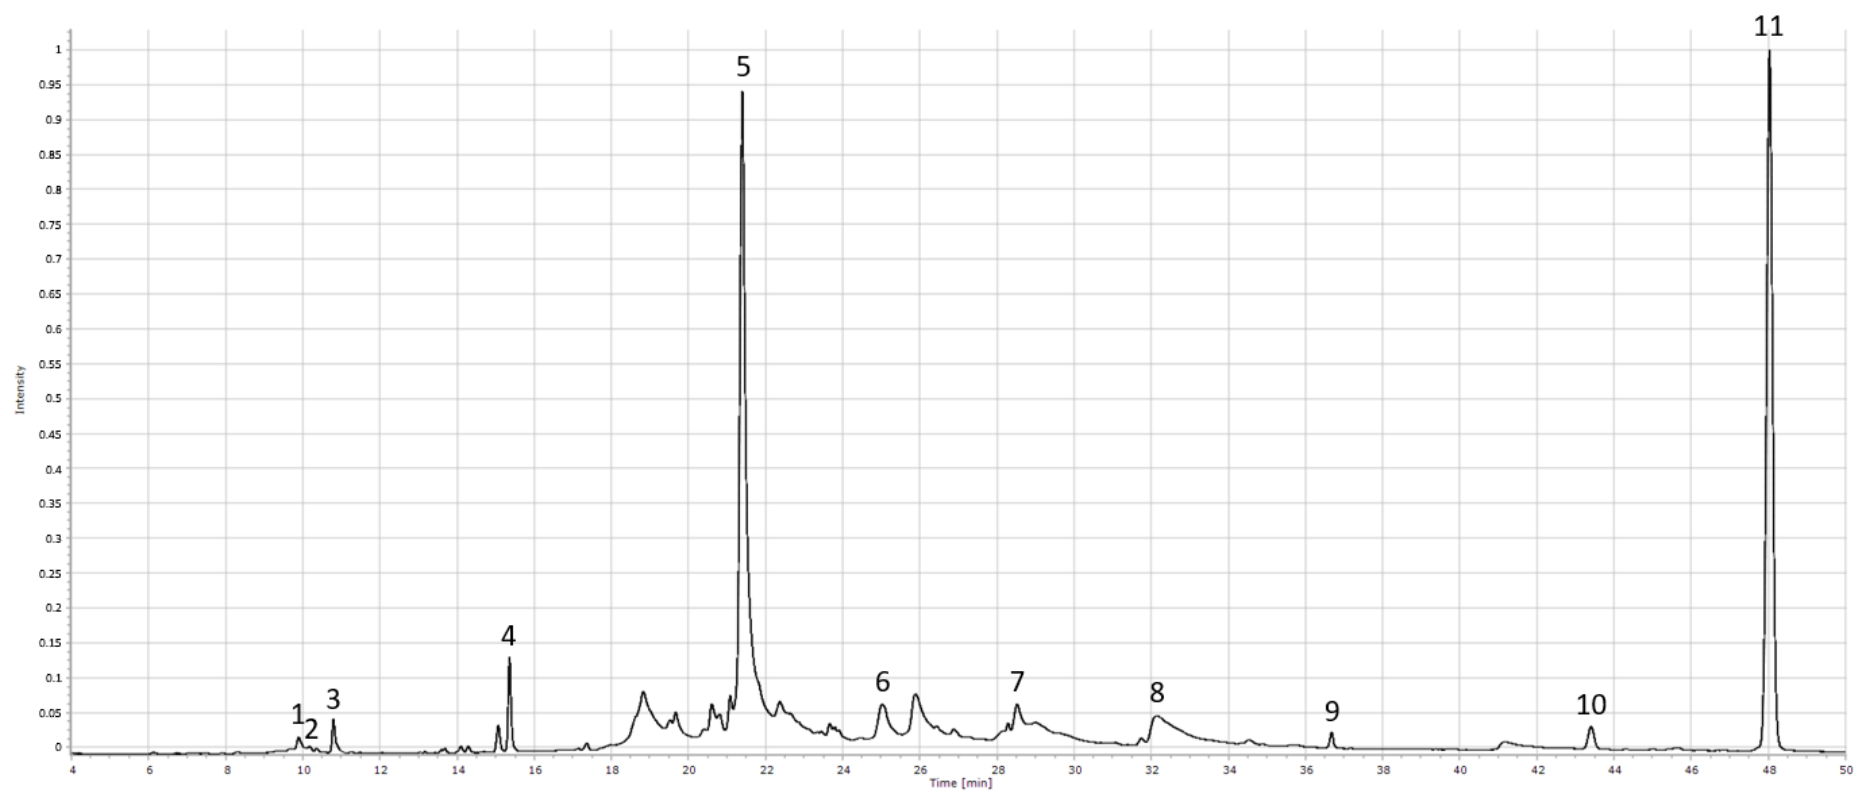

**Figure S11.** The average HPLC chromatogram of *Matricaria recutita* L. extracts, 360 nm. 1 – chlorogenic acid; 2 – caffeic acid; 5 – apigenin-7-glucoside; 8 – apigenin.

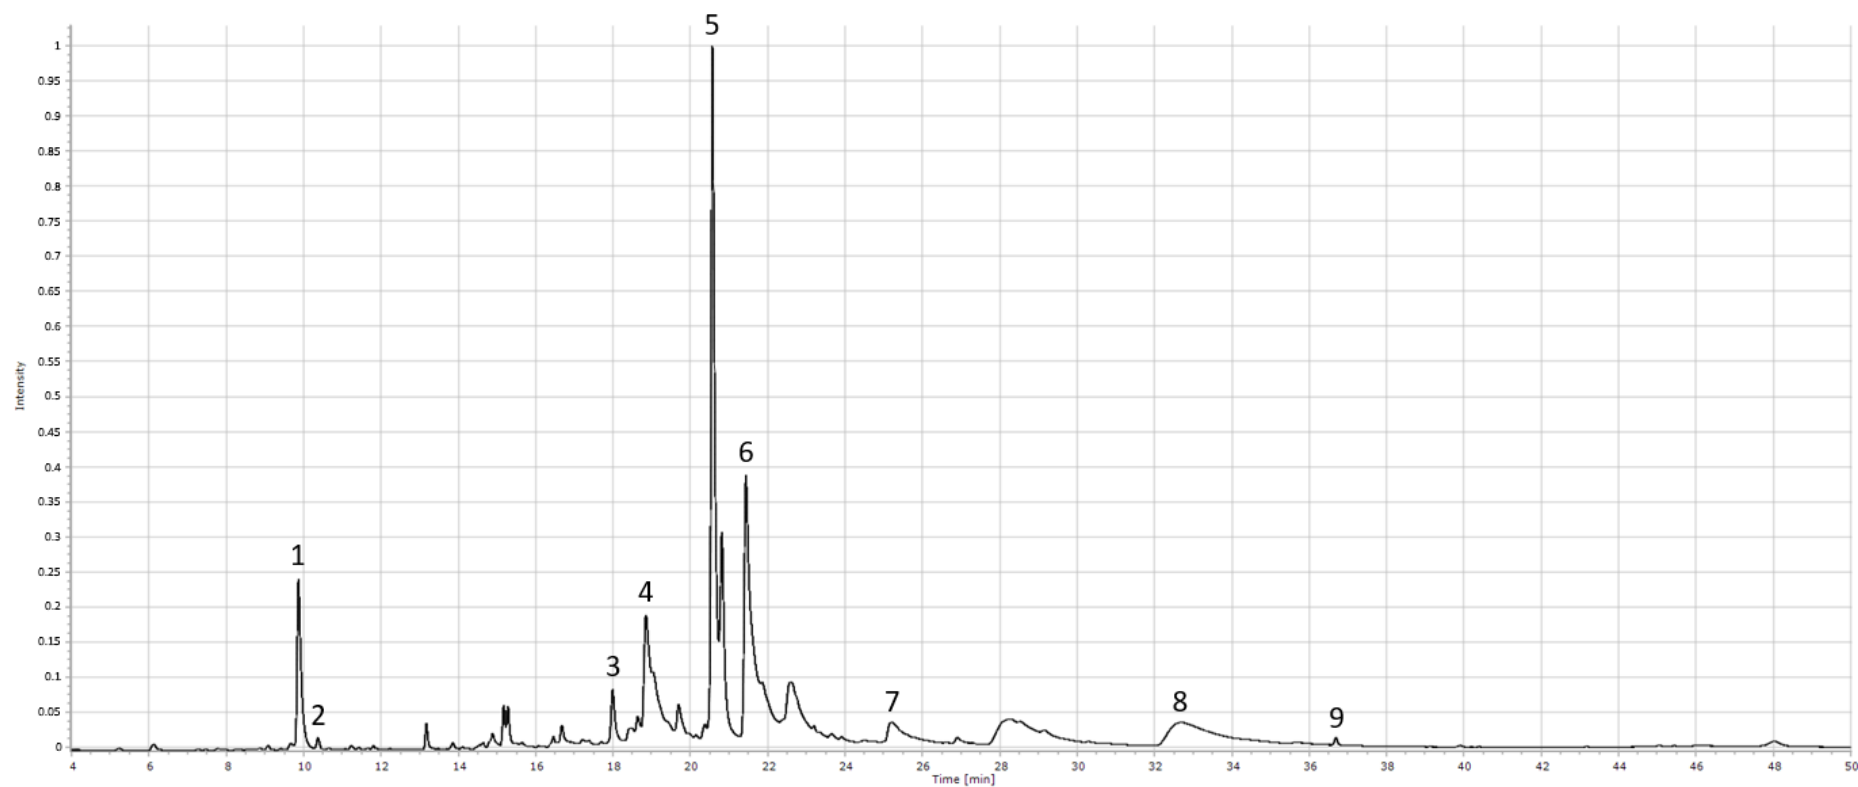

**Figure S12.** The average HPLC chromatogram of *Achillea millefolium* L. extracts, 360 nm. 1 – chlorogenic acid; 2 – caffeic acid; 3 – rutin; 6 – apigenin-7-glucoside; 8 – apigenin.
